# Supplementary material
Source: PubMed Central journal article supplement (PMC4738155)
Supplement: NIHMS741242-supplement-2.pdf [file NIHMS741242-supplement-2.pdf]

**Supplementary Figure 1.** *EZH2* and MEK-ERK and PI3K/AKT signaling pathway expression in lung adenocarcinoma and HBEC cell lines KRAS wild-type and with different amino acid substitutions in codon 12 KRAS mutants. A, we analyzed a panel of eight lung adenocarcinoma and HBEC cell lines by examining their expression of *EZH2*, phospho-MEK1/2, MEK1/2, phospho-AKT, AKT, phospho-*EZH2*, phospho-STAT3 and STAT3 using Western blotting.

**Supplementary Figure 2.** Sensitivity in vitro to AZD6244 and MK2206 was significantly increased in the presence of highly selective *EZH2* inhibitor GSK343, EPZ6438 and GSK126 in NSCLC cells expressing mutant KRAS<sup>G12C</sup> and KRAS<sup>G12D</sup>, respectively. A, Top, pharmacologic inhibition of *EZH2* by treatment with GSK343 decreased slightly the viability of the lung adenocarcinoma cell lines expressing KRAS<sup>WT</sup> and strongly in KRAS<sup>G12C</sup> exposed to MEK1 inhibitor AZD6244 according to an MTS assay (data are graphed as the mean percent increase ± percent standard deviation). Treatment with GSK343 caused a 1.9-fold ( $P < 0.05$ ) decrease in the AZD6244 IC50 in H1993 cells expressing KRAS<sup>WT</sup>, and 4.7-fold ( $P < 0.03$ ) decrease in it in H23 cells expressing KRAS<sup>G12C</sup>. Bottom, pharmacologic inhibition of *EZH2* by treatment with GSK343 decreased slightly the viability of the lung adenocarcinoma cell lines expressing KRAS<sup>WT</sup> and strongly in KRAS<sup>G12D</sup> exposed to AKT inhibitor MK2206 according to an MTS assay. (data are graphed as the mean percent increase ± percent standard deviation). Treatment with GSK343 caused a 2.5-fold ( $P < 0.05$ ) decrease in the MK2206 IC50 in H1993 cells expressing KRAS<sup>WT</sup>, and a 4.4-fold ( $P < 0.05$ ) decrease in

it in HCC461 cells expressing KRAS<sup>G12D</sup>. B, Treatment with EPZ6438 and GSK126 caused a 13-fold and 10-fold, respectively (P < 0.0001) decrease in the AZD6244 IC50 in H1993 cells expressing KRAS<sup>WT</sup>, and 15-fold and 63-fold, respectively (P < 0.0001) decrease in it in H23 cells expressing KRAS<sup>G12C</sup>, and 13-fold and 14-fold, respectively (P < 0.0001) decrease in it in H461 cells expressing KRAS<sup>G12D</sup>. Bottom, Treatment with EPZ6438 and GSK126 caused a 2.5-fold and 6.6-fold, respectively (P < 0.0001) decrease in the MK2206 IC50 in H1993 cells expressing KRAS<sup>WT</sup>, and 14-fold and 6.7-fold, respectively (P < 0.0001) decrease in it in H23 cells expressing KRAS<sup>G12C</sup>, and 4-fold and 17-fold, respectively (P < 0.0001) decrease in it in H461 cells expressing KRAS<sup>G12D</sup>.
