# Supplementary material
Source: PubMed Central journal article supplement (PMC4738155)
Supplement: NIHMS741242-supplement-3.pdf [file NIHMS741242-supplement-3.pdf]

**Supplementary Table 1. Summary of the clinicopathological characteristics of the patients with lung adenocarcinoma examined for *EZH2* expression and KRAS mutations (N=265)**

|                  | Category             | Frequency Count | Percent of Total Frequency |
|------------------|----------------------|-----------------|----------------------------|
| Gender           | Female               | 142             | 53.58                      |
|                  | Male                 | 123             | 46.42                      |
| Smoking Status   | Current              | 97              | 36.6                       |
|                  | Former               | 123             | 46.42                      |
|                  | Never                | 45              | 16.98                      |
| T Stage (IASLC)  | T1                   | 95              | 35.85                      |
|                  | T2                   | 121             | 45.66                      |
|                  | T3                   | 39              | 14.72                      |
|                  | T4                   | 10              | 3.77                       |
| N Stage (IASLC)  | N0                   | 187             | 70.57                      |
|                  | N1                   | 35              | 13.21                      |
|                  | N2                   | 42              | 15.85                      |
|                  | N3                   | 1               | 0.38                       |
| TNM Stage IASLC  | I                    | 141             | 53.21                      |
|                  | II                   | 58              | 21.89                      |
|                  | III                  | 55              | 20.75                      |
|                  | IV                   | 11              | 4.15                       |
| Adjuvant Therapy | No                   | 147             | 55.47                      |
|                  | Yes                  | 105             | 39.62                      |
| Vital Status     | Alive                | 129             | 48.68                      |
|                  | Dead                 | 136             | 51.32                      |
| Recurrence       | No                   | 145             | 54.72                      |
|                  | Yes                  | 120             | 45.28                      |
| KRAS mutation    | Negative (wild-type) | 183             | 69.06                      |
|                  | Positive (mutant)    | 82              | 30.94                      |
|                  | Codon 12             | 72              | 87.80                      |
|                  | Codon 13             | 10              | 12.19                      |
|                  | Cys substitutions    | 40              | 48.78                      |
|                  | Asp substitutions    | 16              | 19.51                      |
|                  | Val substitutions    | 14              | 17.07                      |
|                  | Other substitutions  | 12              | 14.63                      |

IASLC; International Association for the Study of Lung Cancer
