# Supplementary material
Source: PubMed Central journal article supplement (PMC4738155)

Supplementary Figures 1.

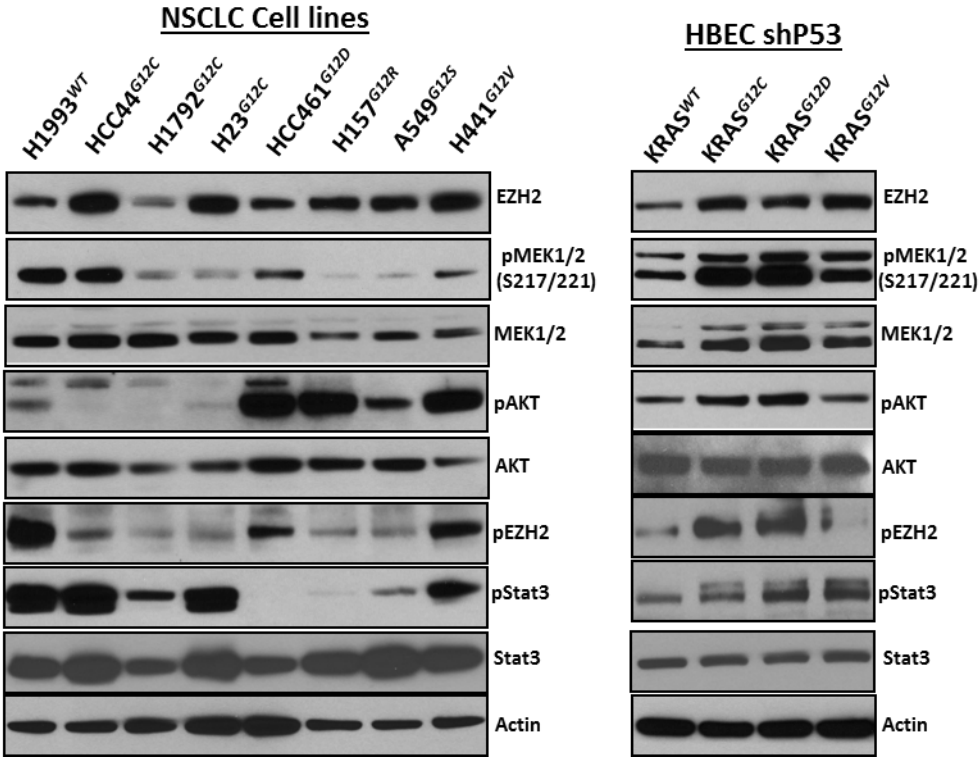

**A**

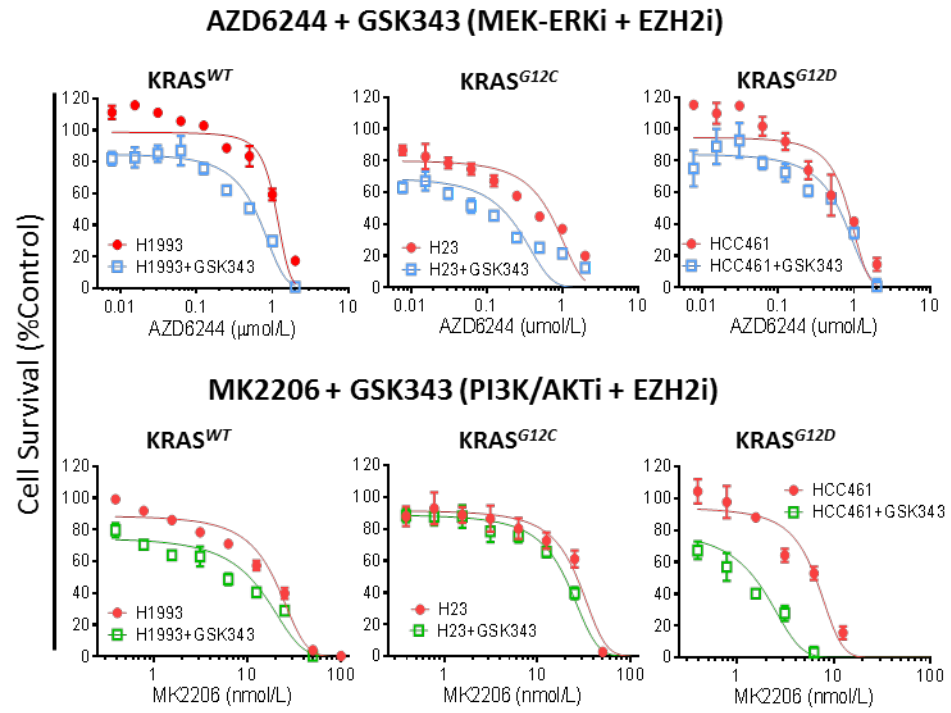

**B**

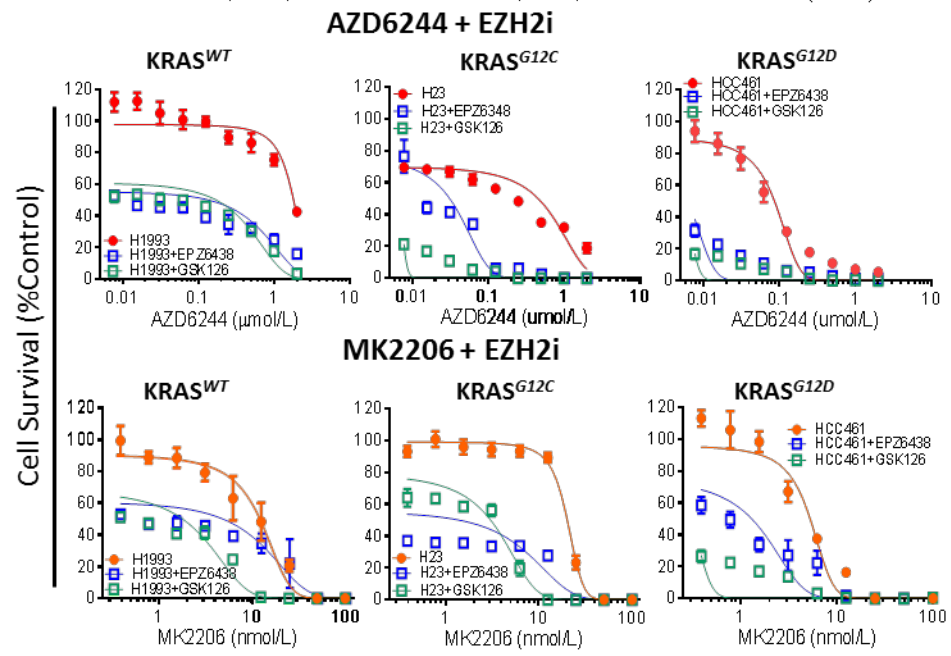

Supplement: NIHMS741242-supplement-1.pdf [file NIHMS741242-supplement-1.pdf]
